# Supplementary material for: Molecular characterization of irinotecan (SN-38) resistant human breast cancer cell lines
Source: Springer Nature journal article supplement (doi:10.1186/s12885-016-2071-1), 2016-01-22

## Supplementary data

**sFigure 1:** FISH analysis of *TOP1* and CEN-20 in human breast cancer cell lines and the correlation between FISH/SNP derived *TOP1* copy numbers and between *TOP1* copy numbers and gene expression.

A) FISH analysis of *TOP1*, CEN-20 and *TOP1*/CEN-20 ratio in 52 breast cancer cell lines. Data are sorted from lowest to highest *TOP1* copy number. B) *TOP1* FISH score vs. SNP derived CN state of 52 breast cancer cell lines. Based on the *TOP1* SNP derived copy number values the cell lines were categorized as loss, neutral, gain or high gain. Kruskal-Wallis Test for trend across ordered groups  $p < 0.0001$ . C) Correlation between *TOP1* FISH score and *TOP1* gene expression in 39 breast cancer cell lines ( $R^2 = 0.50$ ,  $p = 0.0012$ ). D) Overview of the 9 selected cell lines with regards to ER, HER2, *TOP1* copy numbers and  $IC_{50}$  values

**sFigure 2:** Top1 protein expression, Top1 enzyme activity and sensitivities to SN-38 in 9 selected breast cancer cell lines.

A) Western blot showing the levels of Top1 in the 9 selected breast cancer cell lines.  $\beta$ -actin is included as loading control and the *TOP1* copy number status is indicated below the blot. B) Cellular Top1 enzyme activity in the 9 selected breast cancer cell lines and the response to 30  $\mu$ M SN-38. Lysis buffer is included as a background control. C) The sensitivity to SN-38 and the derived  $IC_{50}$  values in the 9 selected breast cancer cell lines.

**sFigure 3:** Sensitivity of (a) Acquired and (b) *De novo* to their corresponding final concentration of SN-38 in comparison to their DMSO controls using MTT assay. Cell lines were exposed to their corresponding SN-38 concentration for 120h. Triplicate wells were analyzed, and data shown is mean  $\pm$  s.d. of a representative experiment in percentage,  $n = 3$ .

**sFigure 4:** Growth curves of the  $MDA_{acq}$ ,  $MCF-7_{acq}$ ,  $MDA_{de novo}$ ,  $MCF-7_{de novo}$  cell lines in comparison to their parental and DMSO controls. Cell lines were seeded in 6-well plates and each well was counted 3 times. Data shown is the mean of three counts of cells from each well  $\pm$  s.d. Growth analysis was done without SN-38 added.

**sFigure 5:** Cell cycle distribution of resistant cell lines in comparison to their respective DMSO controls. Cells were stained with Propidium Iodide and analysed using FACS and FLOJO software. Cell cycle analysis was done in the absence of SN-38.

**sFigure 6:** Sensitivity to SN-38 in docetaxel resistant breast cancer cell lines. Docetaxel resistant MCF-7 (Res 65 nM) and MDA-231 (Res 150 nM) breast cancer cells lines and the corresponding parental control cell lines were exposed to SN-38 (0-30  $\mu$ M) as indicated for 72 hours. Data shows relative viability as measured in MTT assays. Triplicate wells were analyzed, and data shown is mean  $\pm$  s.d. of a representative experiment in percent of untreated cell lines.

**sFigure 7:** Global expression analysis (a) Sample clustering based on probe-level data show clear segregation of the two cell lines, but not MCF-7acq vs. MCF-7DMSO control. (b) Venn diagram illustrating the number of differentially expressed genes between resistant and wild type DMSO control cell lines. (c) Enrichment of Gene Ontology Molecular Function in differentially expressed genes in MCF-7acq cells (1) or MDAacq cells (2). The top 10 most enriched GO (molecular function) terms are shown. Bar length indicate the number of differentially expressed genes with the respective GO-term.

**sFigure 8:** Western blotting of Top2a in SN-38 resistant cell lines in comparison to their respective controls (Parental and DMSO). All samples were immunoblotted with an antibody to  $\beta$ -actin to illustrate equal protein loading (a) Acquired and (b) De novo

**sFigure 9:** Size analysis of Top1 and  $\beta$ -actin in acquired SN-38 resistant MCF7. Nanocapillary electrophoresis was applied to simultaneously detection and quantification of the Top1 and  $\beta$ -actin proteins.

**sFigure 10:** Western blotting of ID3 in MDA-MB-231 and MCF-7 cells with acquired resistance to SN-38 resistant cell lines in comparison to their respective controls (P: Parental, D: DMSO, R: Resistant). All samples were immunoblotted with an antibody to  $\beta$ -actin to illustrate equal protein loading.

## Supplementary section

### Tables

**sTable 1.** FISH analysis of *TOP1*/CEN-20 and *TOP2A*/CEN-17

| <b>Cell line</b>                        | <b><i>TOP1</i><br/>copy<br/>no.</b> | <b>CEN-20<br/>copy no.</b> | <b><i>TOP1/CE</i><br/>N-20 ratio</b> | <b><i>TOP2A</i><br/>copy no.</b> | <b>CEN-17<br/>copy no.</b> | <b><i>TOP2A/</i><br/>CEN-17<br/>ratio</b> |
|-----------------------------------------|-------------------------------------|----------------------------|--------------------------------------|----------------------------------|----------------------------|-------------------------------------------|
| <b>MDA<sub>acq</sub>Pa<br/>rental</b>   | 2.6                                 | 2.18                       | 1.22                                 | 2.48                             | 2.15                       | 1.16                                      |
| <b>MDA<sub>acq</sub>D<br/>MSO</b>       | 3.42                                | 2.67                       | 1.28                                 | 2.42                             | 2.27                       | 1.07                                      |
| <b>MDA<sub>acq</sub></b>                | 3.2                                 | 2.73                       | 1.17                                 | 2.83                             | 2.45                       | 1.16                                      |
| <b>MCF-7<sub>acq</sub><br/>Parental</b> | 3.75                                | 2.87                       | 1.31                                 | 1,83                             | 2.05                       | 0.89                                      |
| <b>MCF-7<sub>acq</sub><br/>DMSO</b>     | 3.78                                | 3.05                       | 1.24                                 | 1.85                             | 2.48                       | 0.74                                      |
| <b>MCF-7<sub>acq</sub></b>              | 3.52                                | 2.73                       | 1.29                                 | 1.75                             | 2.08                       | 0.84                                      |

sFigure 1

A

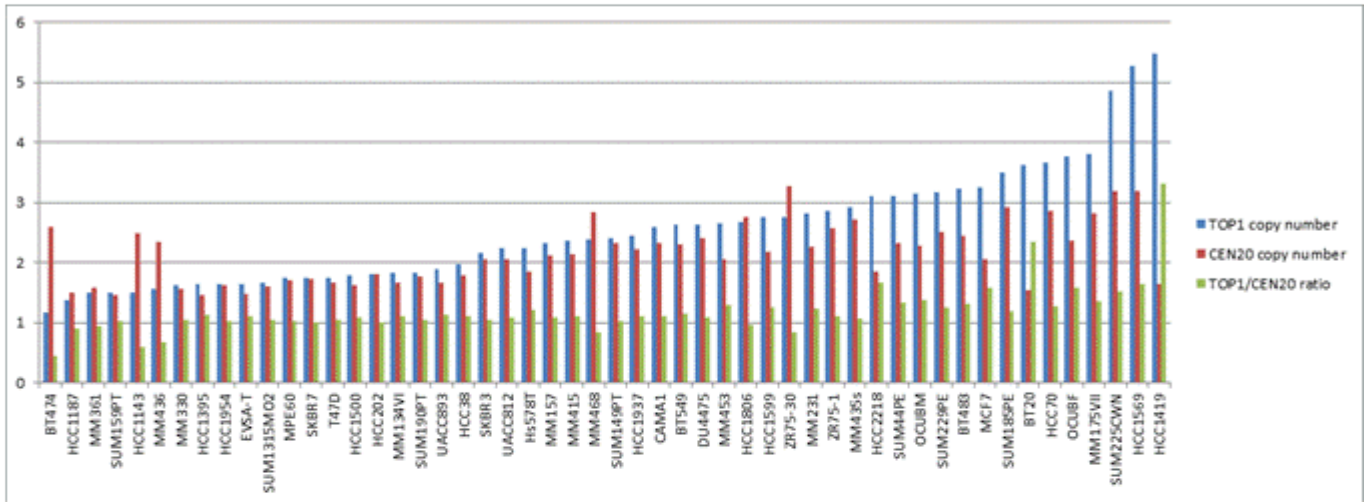

B

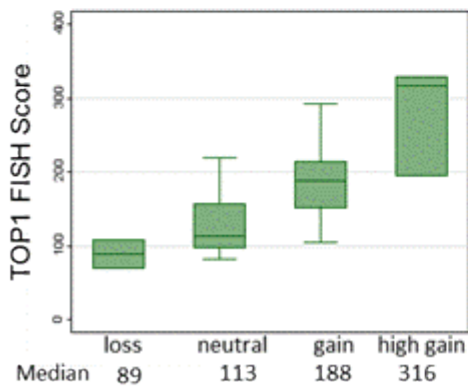

C

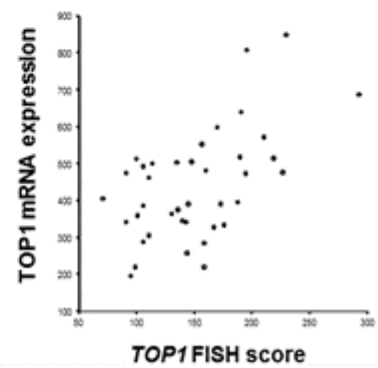

|                                                 | HER2+               |                    | HER2 normal      |                                            |
|-------------------------------------------------|---------------------|--------------------|------------------|--------------------------------------------|
|                                                 | ER+                 | ER-                | ER+              | ER-                                        |
| <b>TOP1 CN Gain</b><br>(IC50 values)            | HCC1419<br>(181 nM) | HCC1569<br>(16 nM) | MCF-7<br>(74 nM) | HCC70<br>(64 nM)<br>MDA-MB-231<br>(248 nM) |
| <b>TOP1 CN Loss or neutral</b><br>(IC50 values) | BT474<br>(5127 nM)  | HCC1954<br>(16 nM) | T47D<br>(1 nM)   | HCC1143<br>(93 nM)                         |

sFigure 2

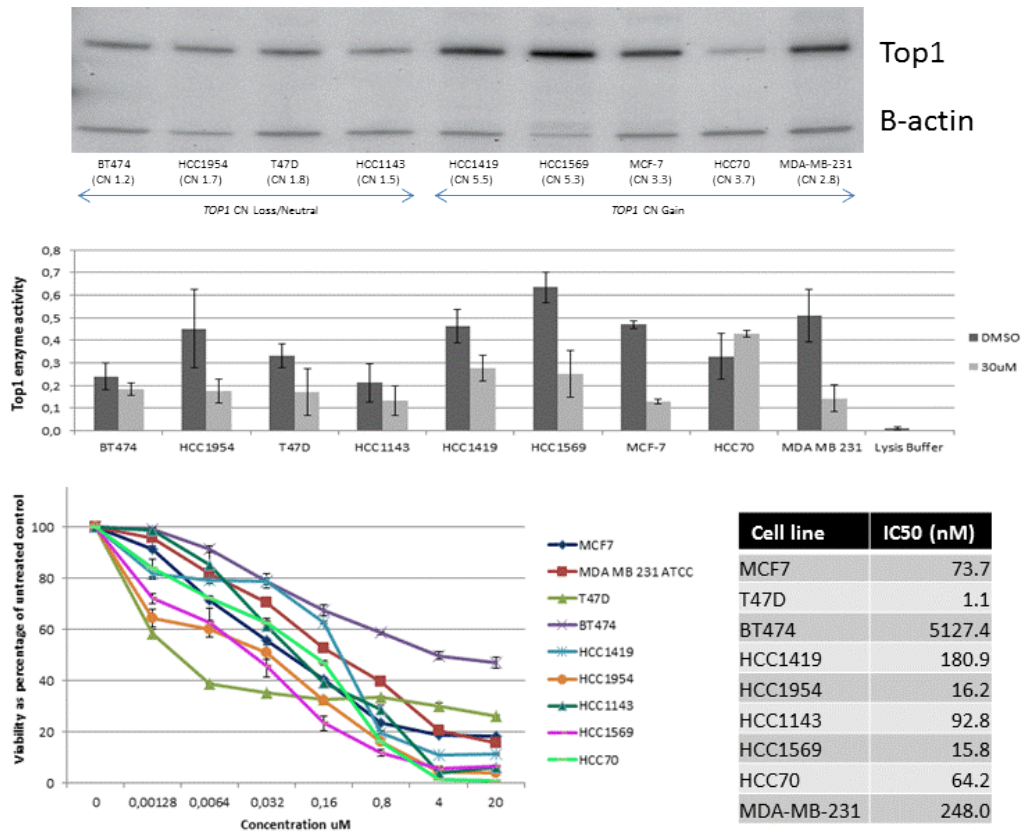

sFigure 3

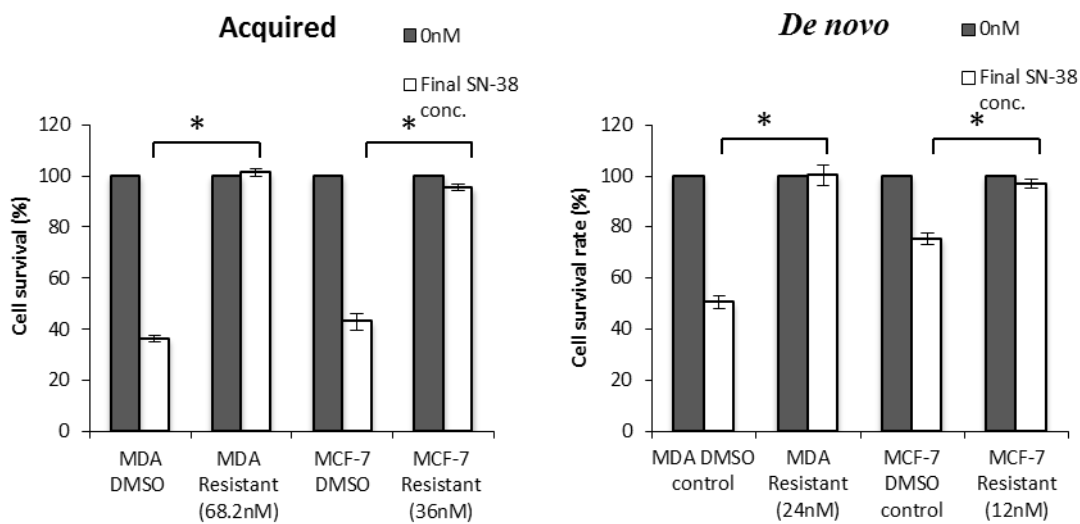

sFigure 4

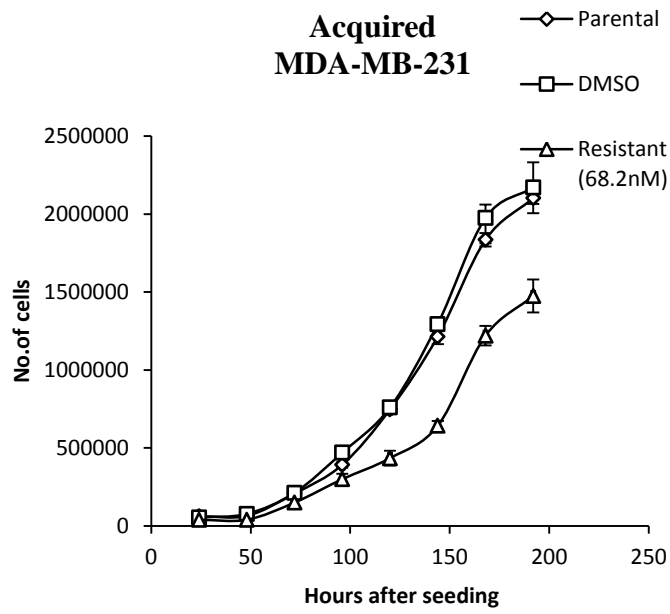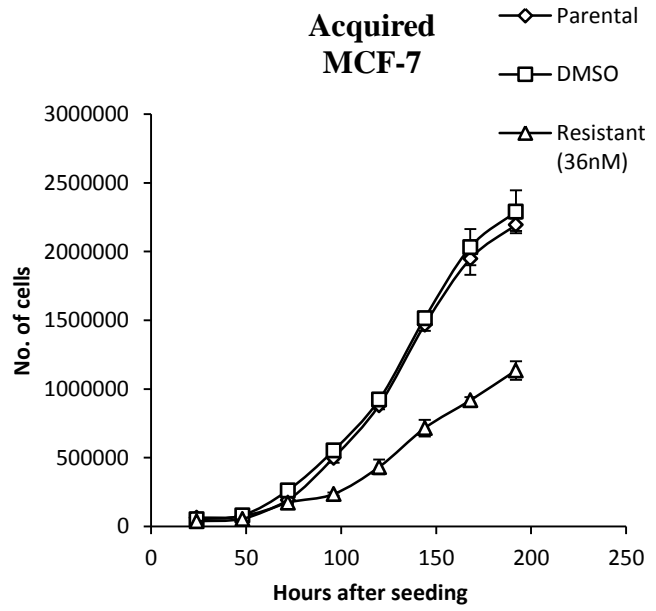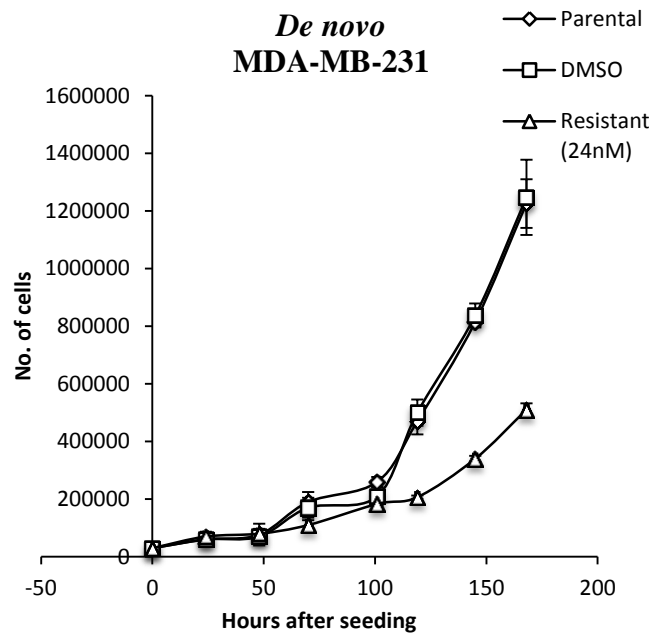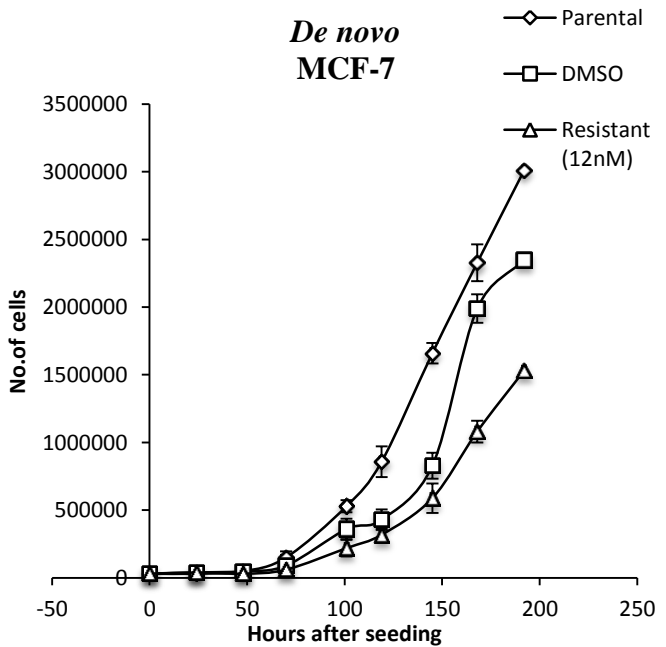

Figure 5

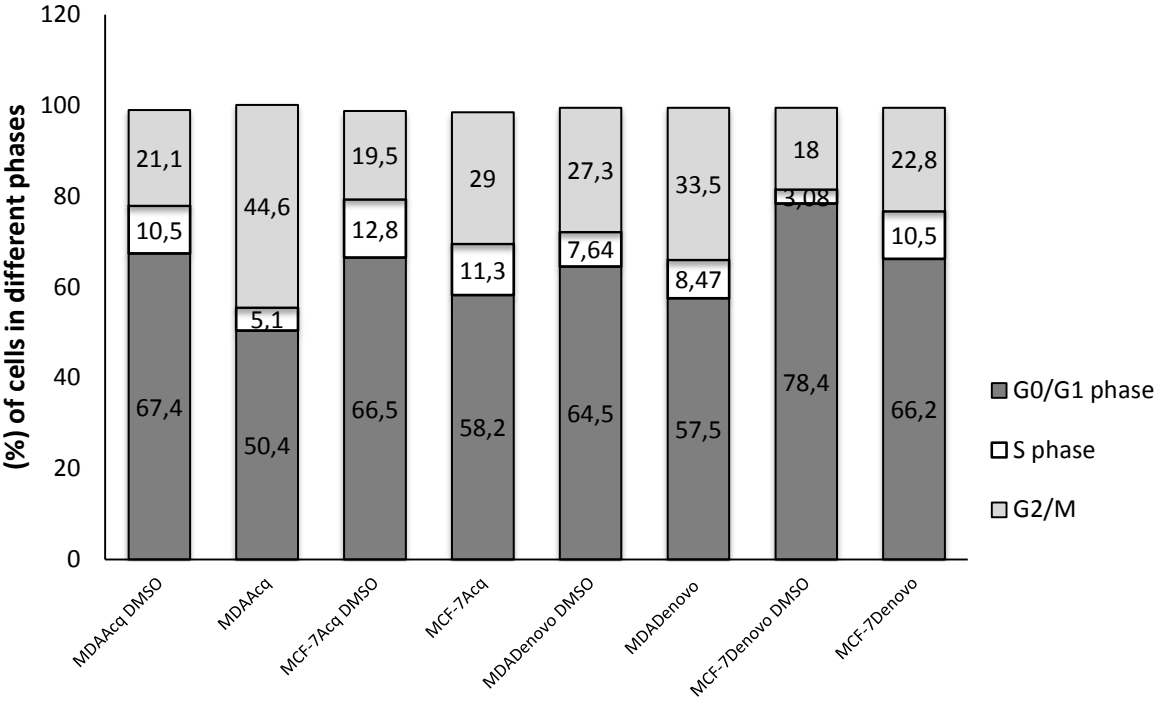

sFigure 6

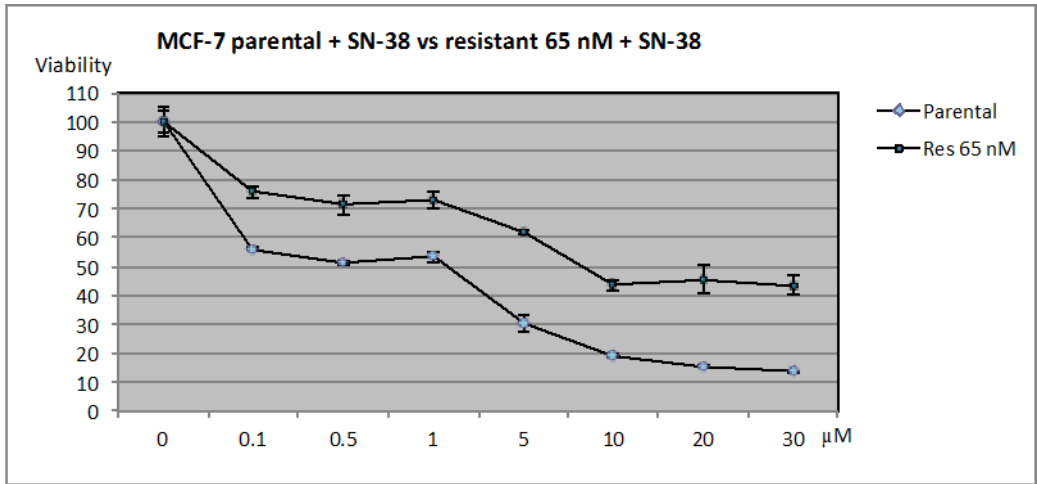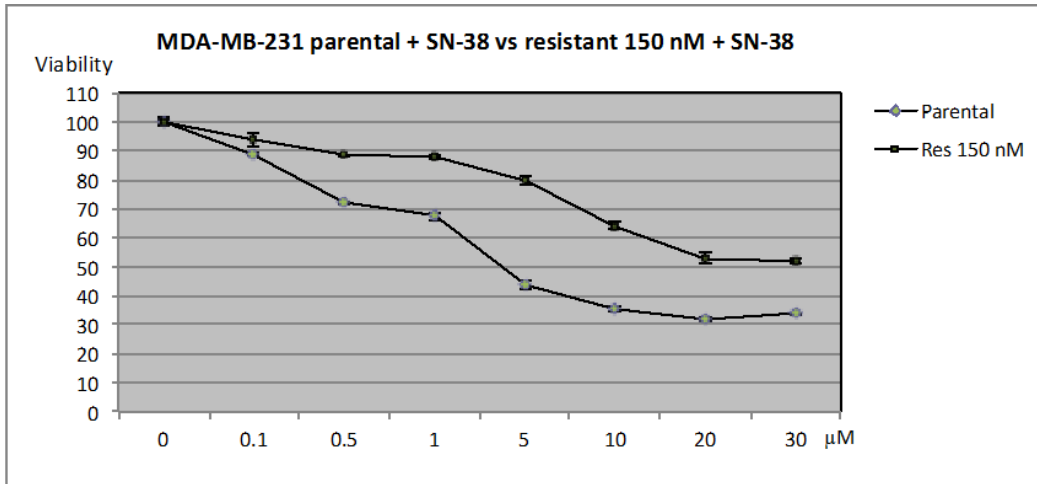



**sFigure 7**

(a)

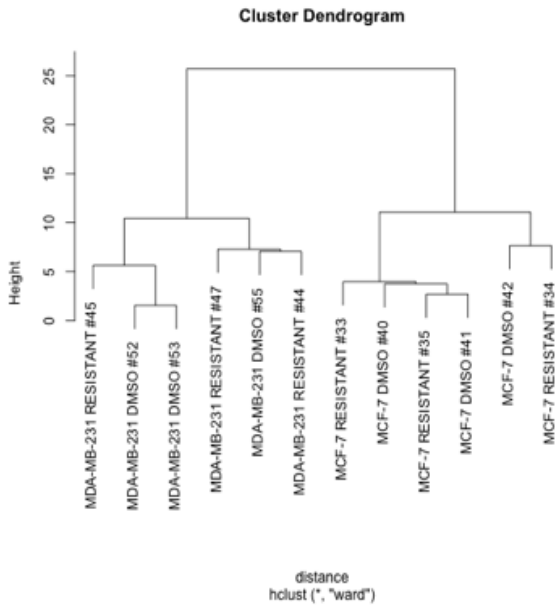

(b)

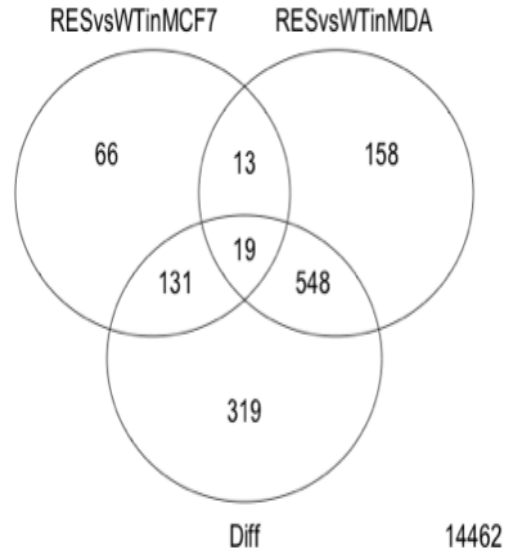

(c)

**MCF-7<sub>acq</sub> vs. MCF-7<sub>DMSO</sub> control: Custom go**

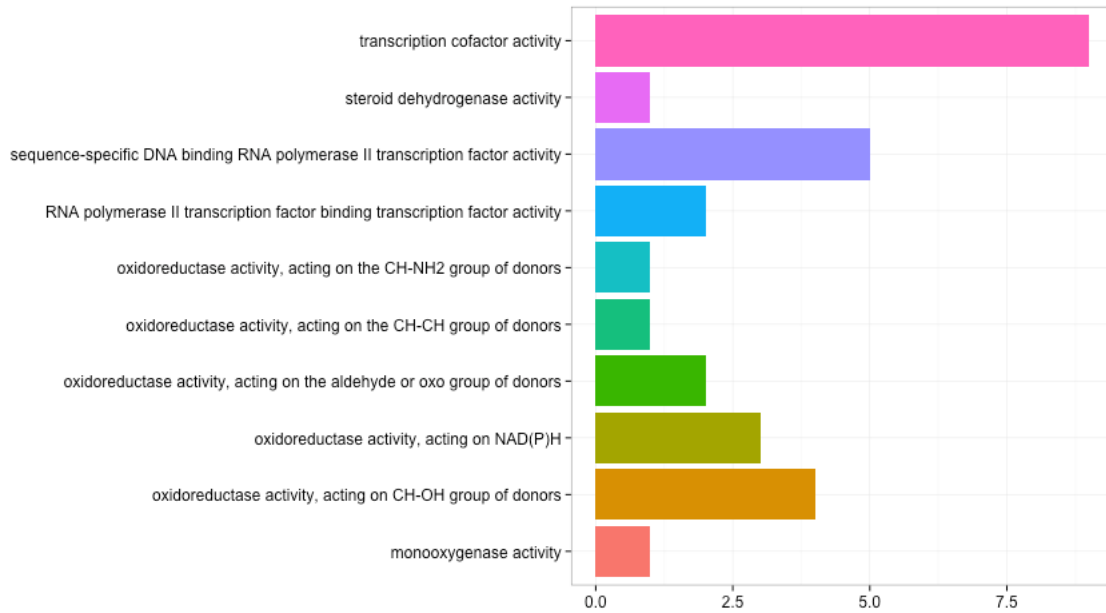

**MDA<sub>acq</sub> vs. MDA<sub>DMSO</sub> control: Custom go**

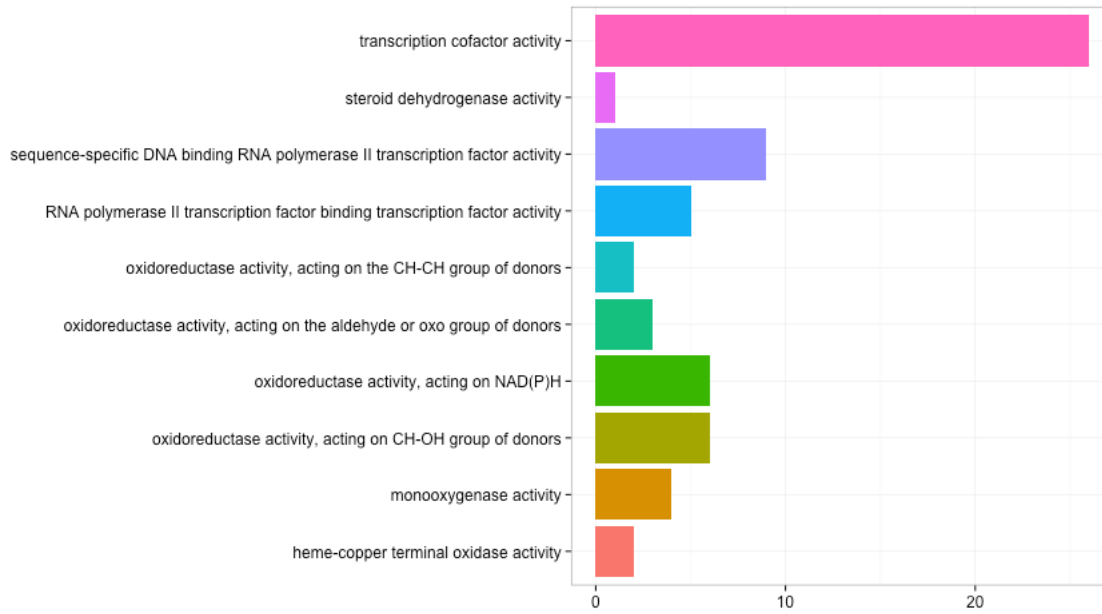

sFigure 8

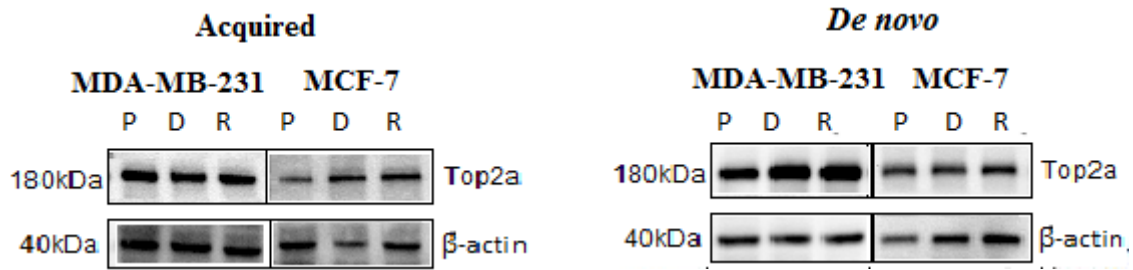

sFigure 9

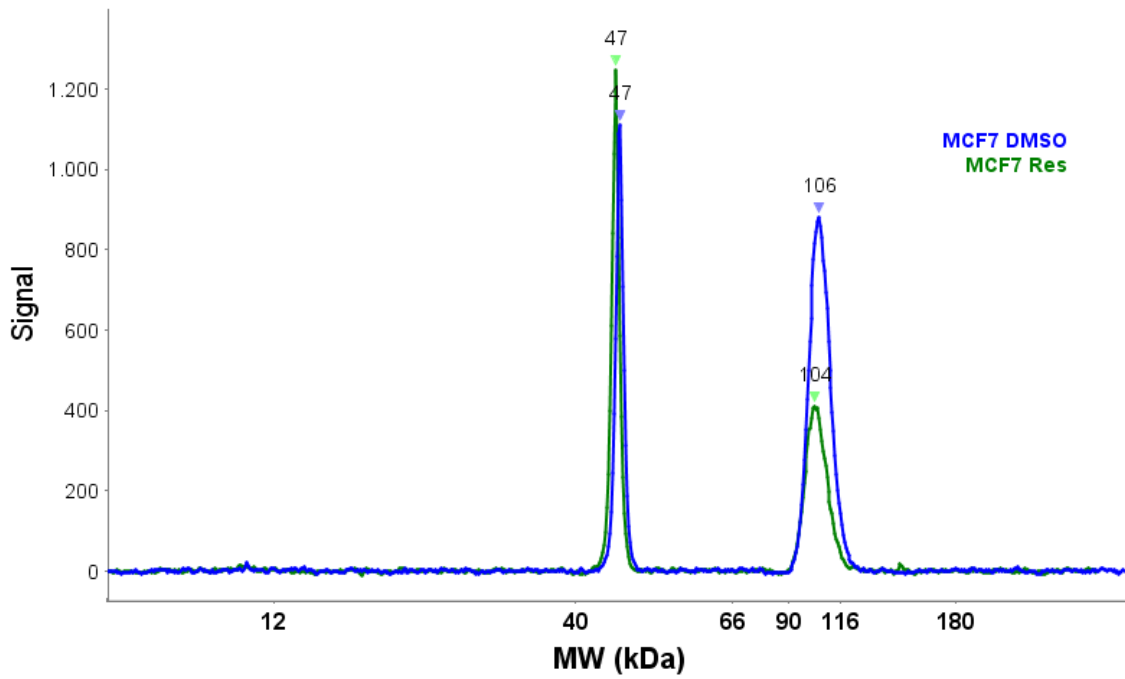

**sFigure 10**

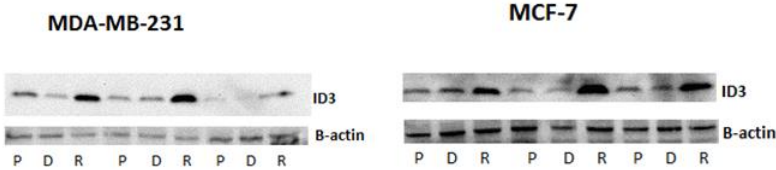

Supplement: MOESM1 [file 9745928]
